# Supplementary material
Source: PubMed Central journal article supplement (PMC5556264)
Supplement: EMBJ-36-2455-s001.pdf [file EMBJ-36-2455-s001.pdf]

## Appendix

### Table of contents

|                                                                                                                         |   |
|-------------------------------------------------------------------------------------------------------------------------|---|
| Legends .....                                                                                                           | 2 |
| Appendix Figure S1: Optimization of the unspecific database search for upper peptide length limitation of peptides..... | 3 |
| Appendix Figure S2: The replicate experiment of legumain pH 6.0 specificity screening.....                              | 4 |
| Appendix Table S1: pH dependence of kinetics of substrate hydrolysis by legumain..                                      | 5 |

## Legends

### **Appendix Figure S1: Optimization of the unspecific database search for upper peptide length limitation of peptides.**

(A) The number of identified cleavage sites and (B) the corresponding database search times for caspase-7-treated samples. The lower peptide length limit was set to 8.

### **Appendix Figure S2: The replicate experiment of legumain specificity screening at pH 6.0.**

The iceLogo representations of legumain cleavage specificity at pH 6.0 in replicate 1 (A) and replicate 2 (B).

### **Appendix Table S1: pH dependence of kinetics of substrate hydrolysis by legumain. Turnover rate constants ( $k_{cat}/K_M$ ) for the hydrolysis of z-AAN-AMC and z-AAD-AMC were determined over a pH range 3.5-7.0.**

Data are represented as mean  $\pm$  SD. Not determined = n. d.

**Appendix Figure S1: Optimization of the unspecific database search for upper peptide length limitation of peptides.**

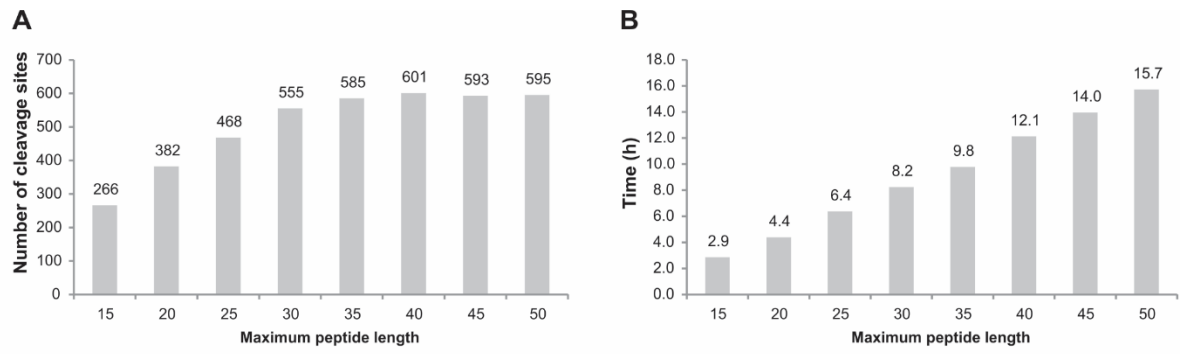

**Appendix Figure S2: The replicate experiment of legumain specificity screening at pH 6.0.**

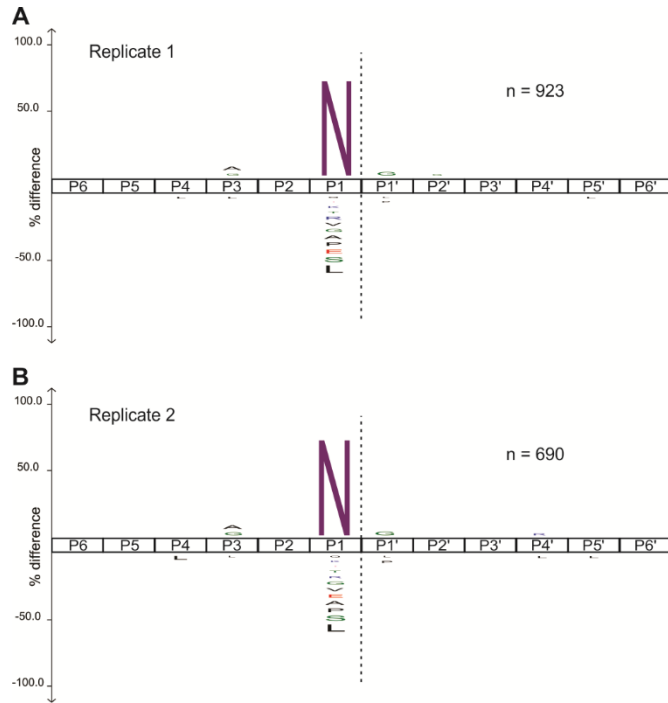

**Appendix Table S1: pH dependence of kinetics of substrate hydrolysis by legumain.**

| Substrate | pH                                  | 7.0           | 6.5             | 6.0             | 5.5             | 5.0             | 4.5             | 4.0           | 3.5           |
|-----------|-------------------------------------|---------------|-----------------|-----------------|-----------------|-----------------|-----------------|---------------|---------------|
| z-AAN-AMC | $k_{cat}/K_M$<br>( $s^{-1}M^{-1}$ ) | 4400<br>± 900 | 29000<br>± 1800 | 30000<br>± 1500 | 27000<br>± 2500 | 20000<br>± 1300 | 15000<br>± 2600 | 9700<br>± 800 | 6500<br>± 200 |
| z-AAD-AMC |                                     | n. d.         | n. d.           | 90<br>± 30      | 610<br>± 60     | 1600<br>± 100   | 2500<br>± 200   | 2300<br>± 100 | 1600<br>± 200 |

Turnover rate constants ( $k_{cat}/K_M$ ) for the hydrolysis of z-AAN-AMC and z-AAD-AMC were determined over a pH range 3.5-7.0 as described.
