# Supplementary material
Source: PubMed Central journal article supplement (PMC5556264)
Supplement: EMBJ-36-2455-s002.pdf [file EMBJ-36-2455-s002.pdf]

## Expanded View Figures

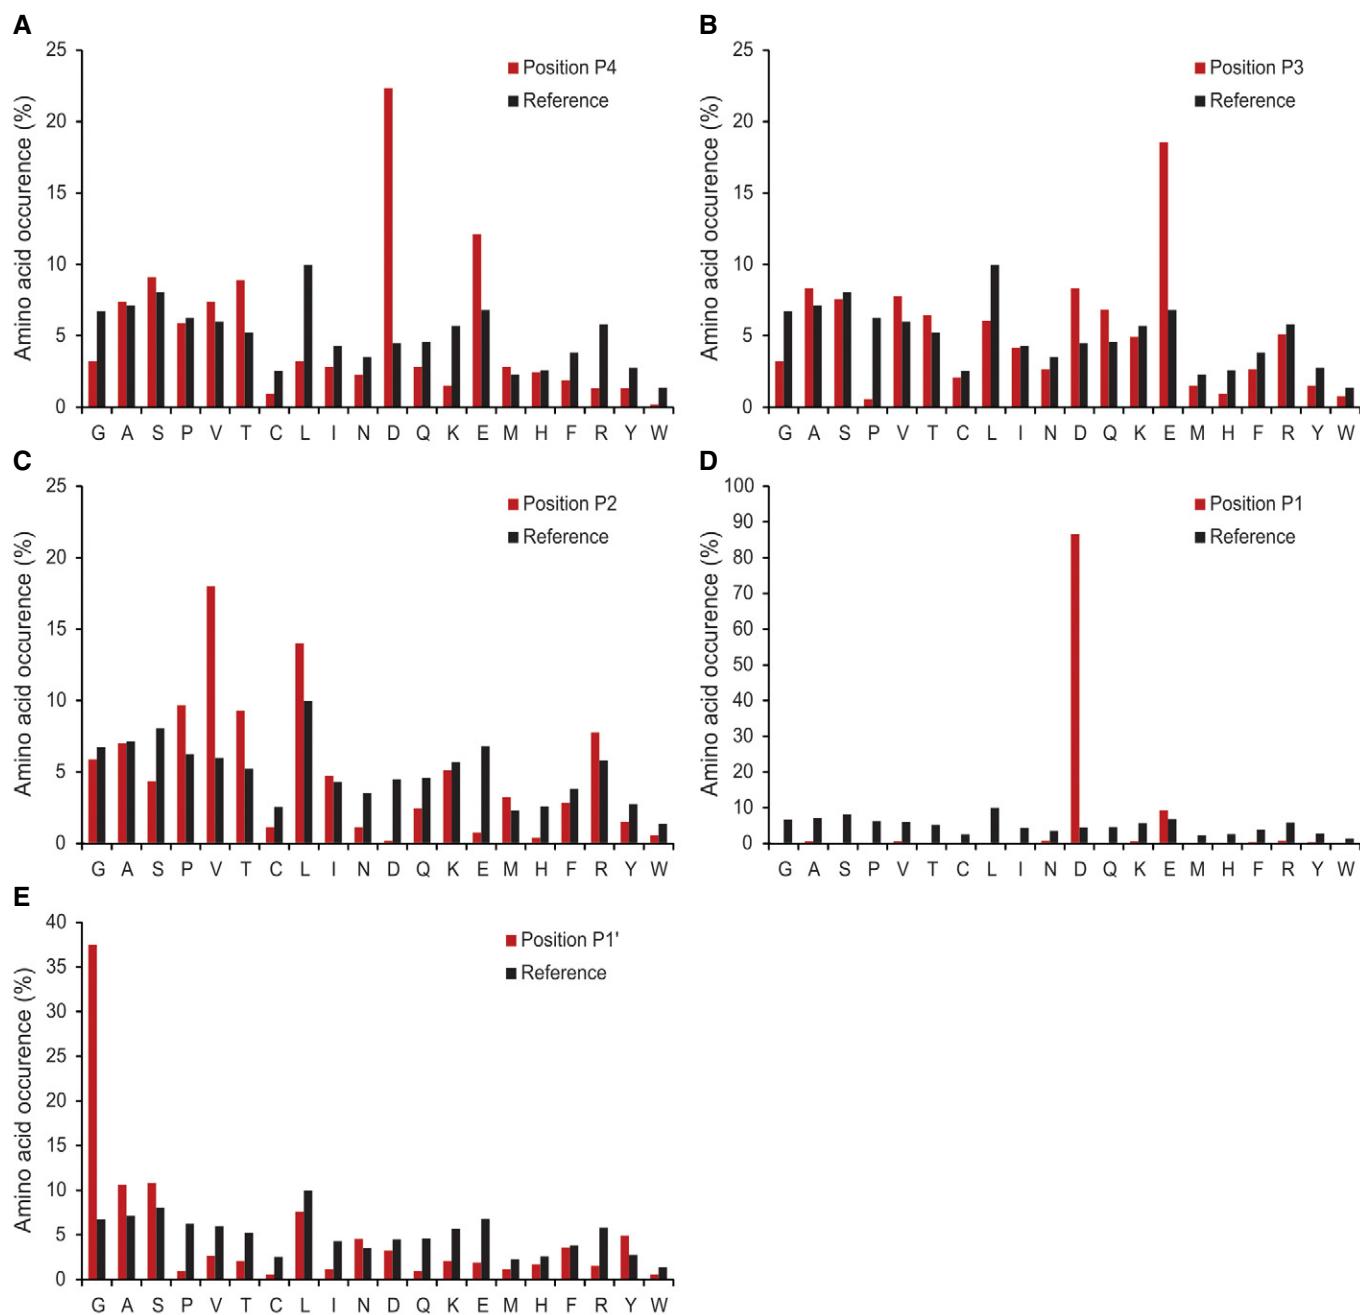

Figure EV1. Caspase-7 cleavage specificity profiling.

A-E The amino acid frequency distribution of caspase-7 P4 to P1' sites compared with the human proteome amino acid frequency distribution.

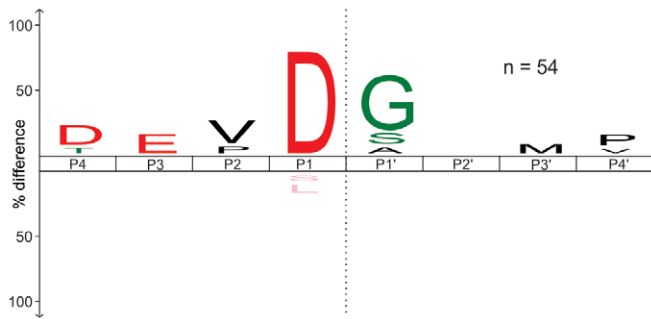

**Figure EV2. Correlation of DIPPS caspase-7 specificity with apoptotic cleavages.**  
Matching cleavage site identifications between DIPPS and DegraBase with representative number of identified cleavage sites (*n*-values).

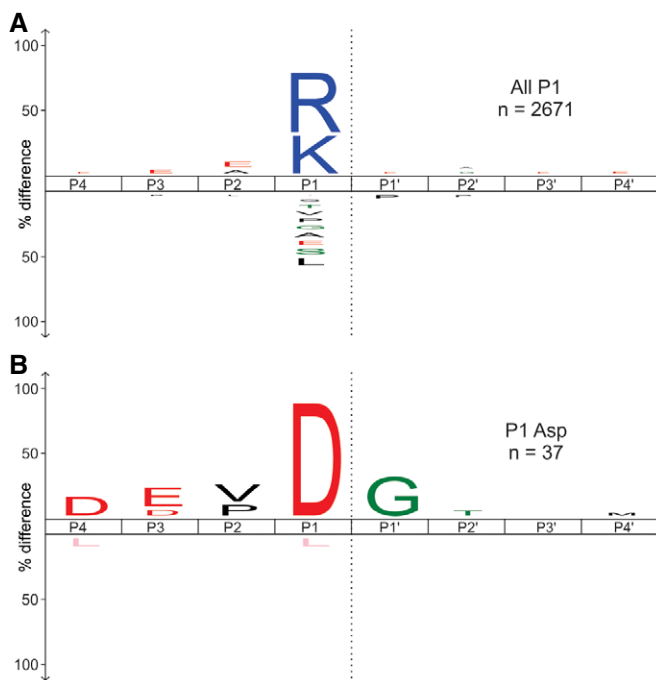

**Figure EV3. Cleavage specificity profile of caspase-7 after the secondary digestion of extracted gel pieces with trypsin.**  
A The first digestion of the gel pieces with caspase-7 was followed by the trypsin digestion. The cleavage specificity profile after the second digestion is presented in the upper panel.  
B In the lower panel, the cleavage profile is only shown for P1 Asp cleavage sequences. The representative number of the cleavage sites used for the cleavage fingerprint construction is presented as *n*-values. The scissile peptide bond between P1 and P1' is indicated as a gray dashed line. *P*-value used for the iceLogo construction was 0.05.

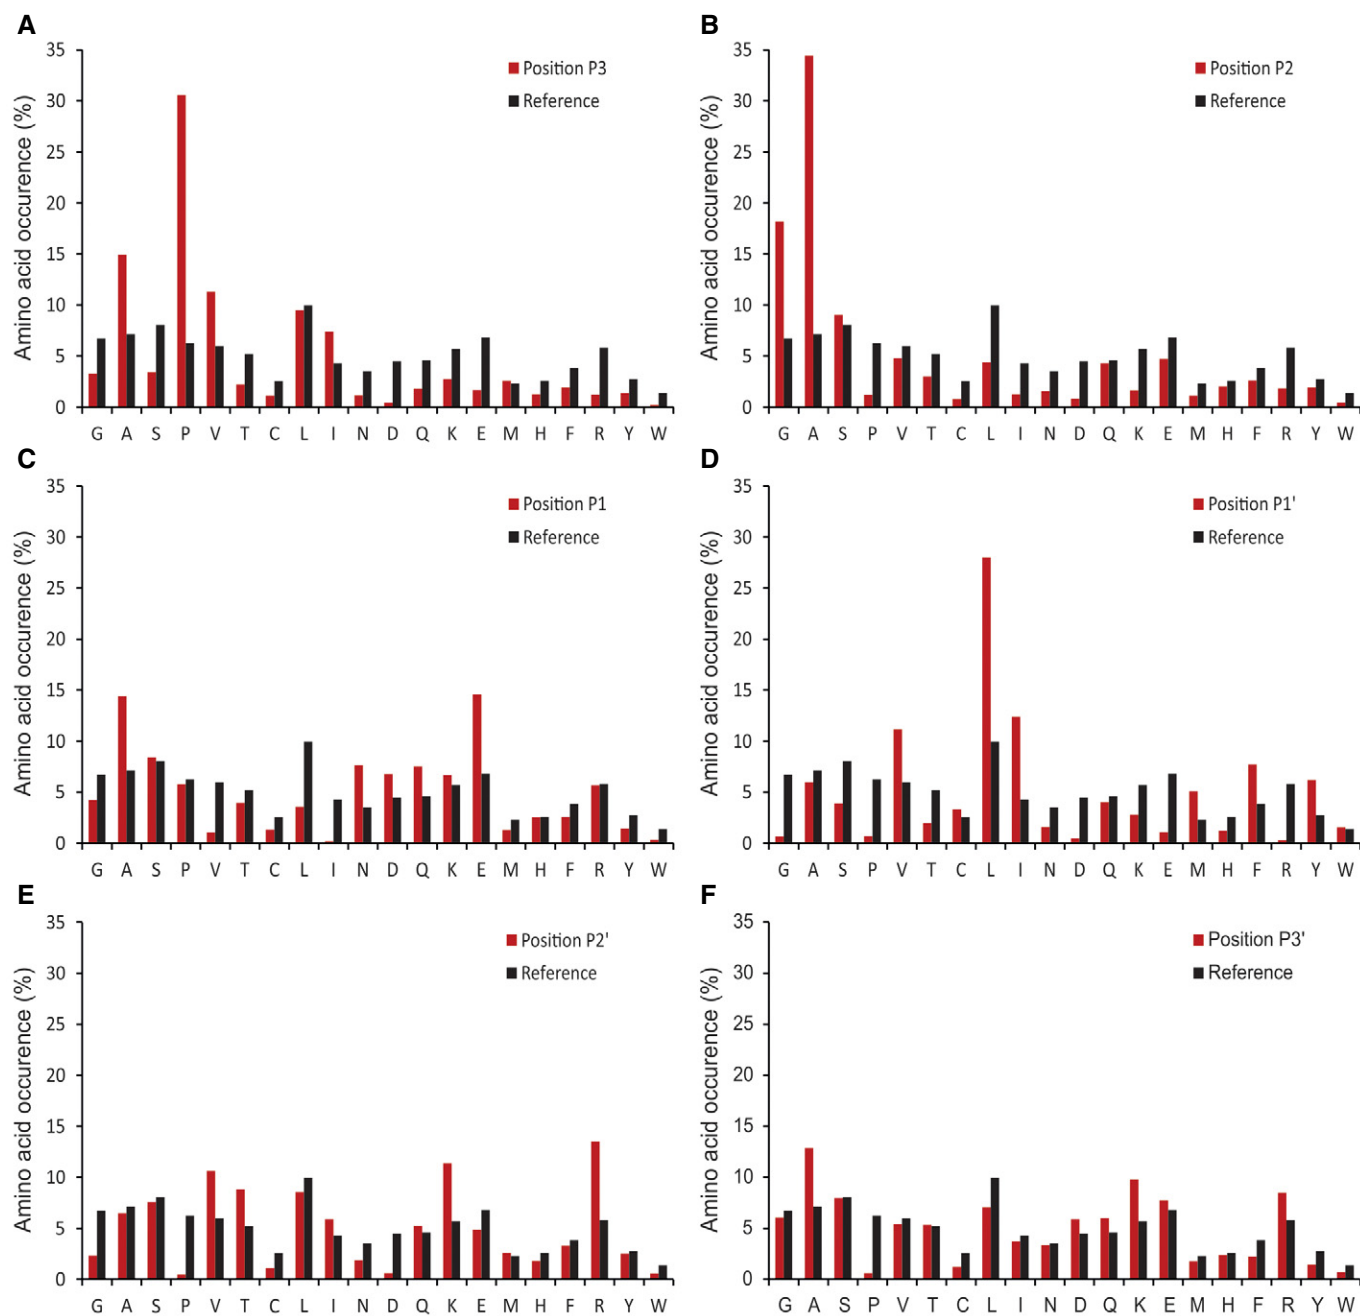

**Figure EV4. MMP-3 cleavage specificity profiling.**

A–F The frequency distribution of MMP-3 P3 to P3' sites compared with the human proteome amino acid frequency distribution.

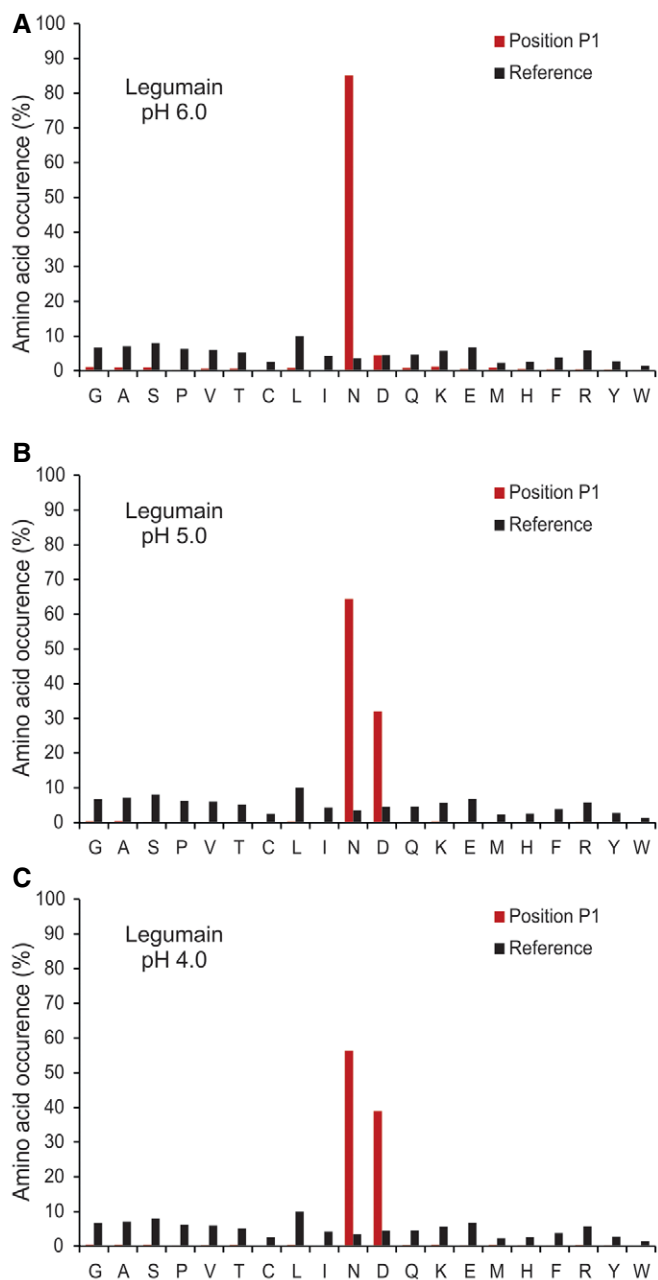

**Figure EV5. Legumain cleavage specificity profiling.**

A–C The frequency distribution of legumain P1 site at (A) pH 6.0, (B) pH 5.0, and (C) pH 4.0 compared with the human proteome amino acid frequency distribution.
